# Supplementary material for: A turn-on bis-BODIPY chemosensor for copper recognition based on the in situ generation of a benzimidazole–triazole receptor and its applications in bioimaging
Source: Royal Society of Chemistry journal article supplement (doi:10.1039/d2nj04508g), 2022-01-01
Supplement: d2nj04508g1.pdf [file d2nj04508g1.pdf]

## Supporting Information

### A turn-on bis-BODIPY chemosensor for copper recognition based on *in-situ* generation of benzimidazole–triazole receptor and its applications in bioimaging

Worakrit Saiyasombat,<sup>a</sup> Sapon Nuchpun,<sup>c</sup> Kanlaya Prapainop Katewongsa,<sup>c</sup> Soraya Pornsuwan,<sup>a</sup> Jan J. Weigand,<sup>d</sup> and Supavadee Kiatisevi<sup>\*a,b</sup>

<sup>a</sup> Department of Chemistry and Center of Excellence for Innovation in Chemistry (PERCH-CIC), Faculty of Science, Mahidol University, Rama VI Rd, Ratchathewi, Bangkok 10400, Thailand.

<sup>b</sup> Center of Sustainable Energy and Green Materials, Faculty of Science, Mahidol University, Salaya, Putthamonthon, Nakhon Pathom 73170, Thailand.

<sup>c</sup> Department of Biochemistry, Faculty of Science, Mahidol University, Rama VI Rd, Ratchathewi, Bangkok 10400, Thailand.

<sup>d</sup> Faculty of Chemistry and Food Chemistry, Technische Universität Dresden, 01062 Dresden, Germany.

\*Corresponding author: Supavadee Kiatisevi, E-mail address: [supavadee.mon@mahidol.edu](mailto:supavadee.mon@mahidol.edu)

#### Contents

|                                                                                        |            |
|----------------------------------------------------------------------------------------|------------|
| <b>1. Synthesis and Characterization</b>                                               | <b>S2</b>  |
| 1a. Synthesis                                                                          | S2         |
| 1b. NMR Spectra                                                                        | S3         |
| 1c. Mass spectra                                                                       | S7         |
| 1d. ESR spectra                                                                        | S8         |
| <b>2. Photophysical and sensing studies</b>                                            | <b>S8</b>  |
| 2a. Absorption studies of <b>BODIPY-NN</b> in the presence of different metal ions     | S8         |
| 2b. Determination of fluorescence quantum yield                                        | S9         |
| 2c. Calculation of limit of detection                                                  | S10        |
| 2d. Time-dependent fluorescence change studies                                         | S10        |
| 2e. DFT calculation                                                                    | S11        |
| 2f. Application in real water samples                                                  | S19        |
| 2g. Cell imaging studies                                                               | S19        |
| <b>3. Comparison of BODIPY-NN to other recently reported fluorescent Cu(II) probes</b> | <b>S22</b> |
| <b>4. References</b>                                                                   | <b>S24</b> |

## 1. Synthesis and Characterization

### 1a. Synthesis

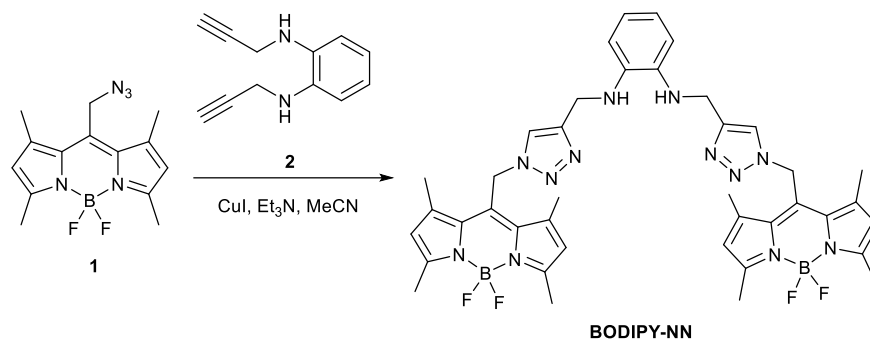

Scheme 1. Synthesis of **BODIPY-NN**.

#### **BODIPY-NN**

In the schlenk tube, **1** (140 mg, 0.46 mmol) and **2** (40 mg, 0.22 mmol) were stirred in 5 mL of MeCN at room temperature under inert atmosphere. To this mixture was added 10 mol% of CuI and 40 mol% of Et<sub>3</sub>N. The reaction mixture was stirred for 18 h, poured into water, and extracted with 3 × 30 mL CH<sub>2</sub>Cl<sub>2</sub>. The organic layer was then collected, washed with brine, and dried over anhydrous Na<sub>2</sub>SO<sub>4</sub>. After solvent removal, the crude product was purified by column chromatography using a gradient elution (5–30% EtOAc in CH<sub>2</sub>Cl<sub>2</sub>) containing 1% of Et<sub>3</sub>N. **BODIPY-NN** was obtained as a red solid in 63% yield (110 mg, 0.140 mmol). <sup>1</sup>H NMR (400 MHz, CDCl<sub>3</sub>): δ 7.38 (s, 2H), 6.71–6.68 (m, 2H), 6.63–6.59 (m, 2H), 6.08 (s, 4H), 5.77 (s, 4H), 4.33 (s, 4H), 3.90 (br s, 2H), 2.54 (s, 12H), 2.17 (s, 12H). <sup>13</sup>C NMR (100 MHz, CDCl<sub>3</sub>): δ 157.80, 146.45, 141.59, 136.97, 132.39, 130.04, 123.16, 120.77, 120.01, 113.20, 45.73, 40.41, 15.85, 14.91. HRMS (ESI) m/z: calcd. for C<sub>40</sub>H<sub>45</sub>B<sub>2</sub>F<sub>4</sub>N<sub>12</sub> [M+H]<sup>+</sup>, 791.4007; found, 791.4010.

## 1b. NMR Spectra

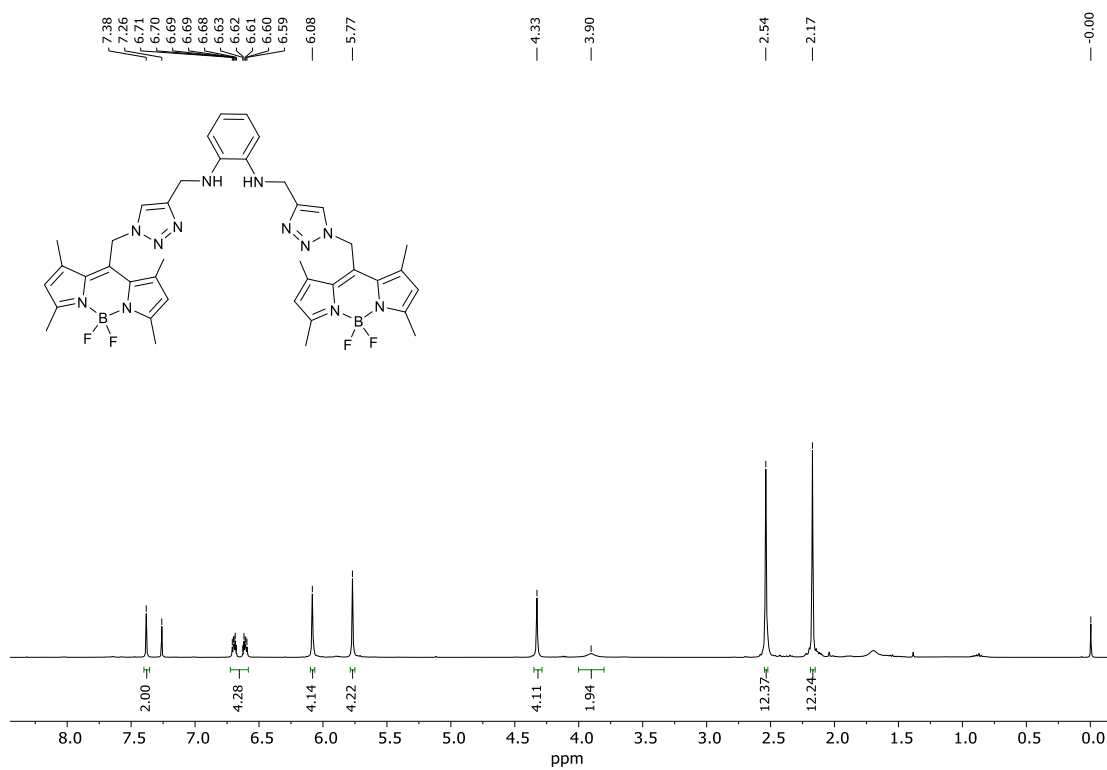

Figure S1.  $^1\text{H}$  NMR spectrum (400 MHz) of BODIPY-NN in  $\text{CDCl}_3$ .

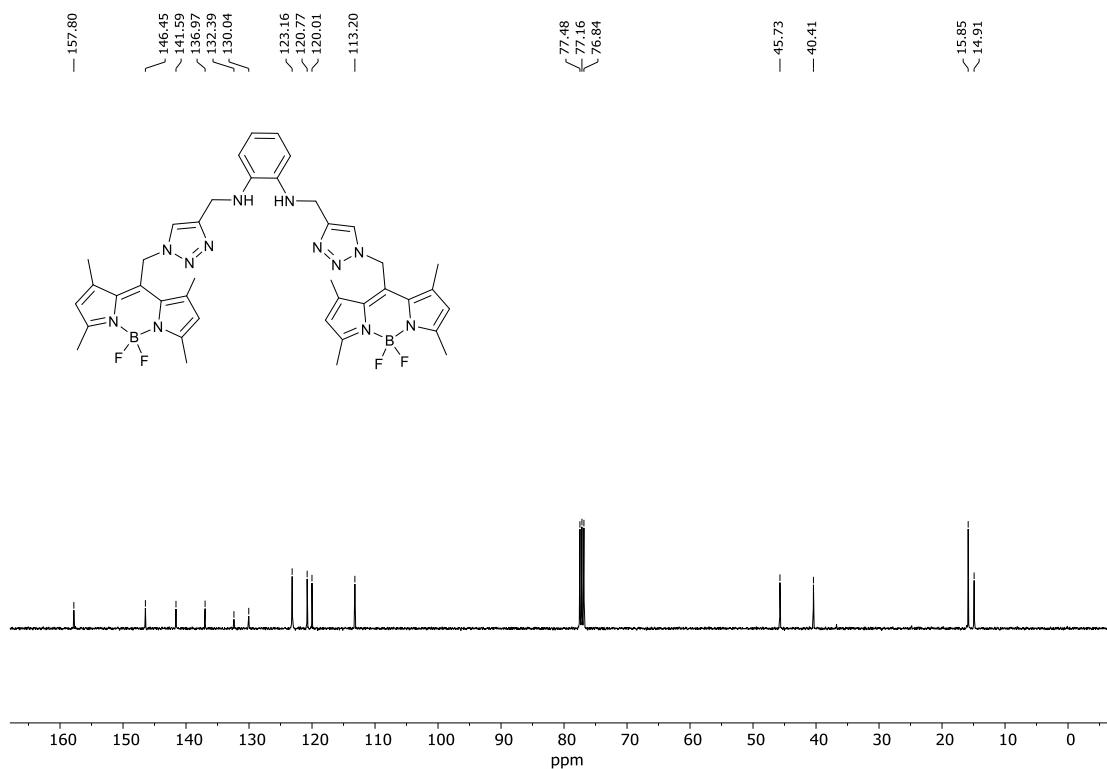

Figure S2.  $^{13}\text{C}$  NMR spectrum (100 MHz) of BODIPY-NN in  $\text{CDCl}_3$ .

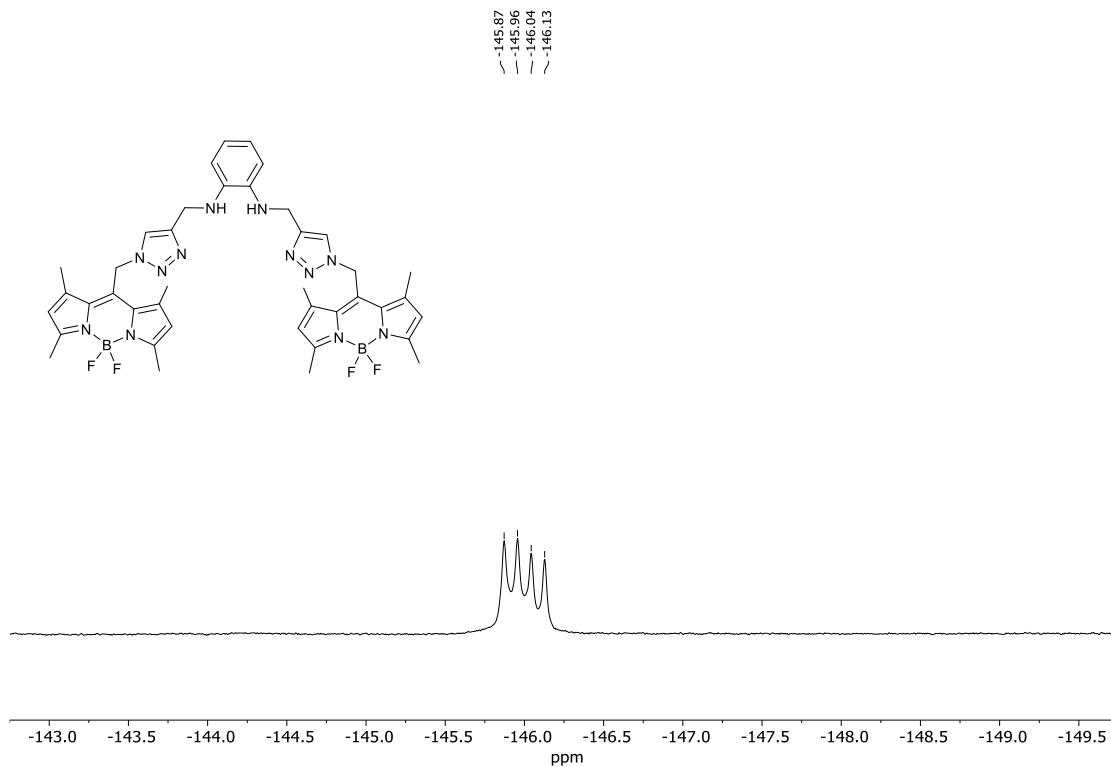

**Figure S3.**  $^{19}\text{F}$  NMR spectrum (376 MHz) of **BODIPY-NN** in  $\text{CDCl}_3$ .

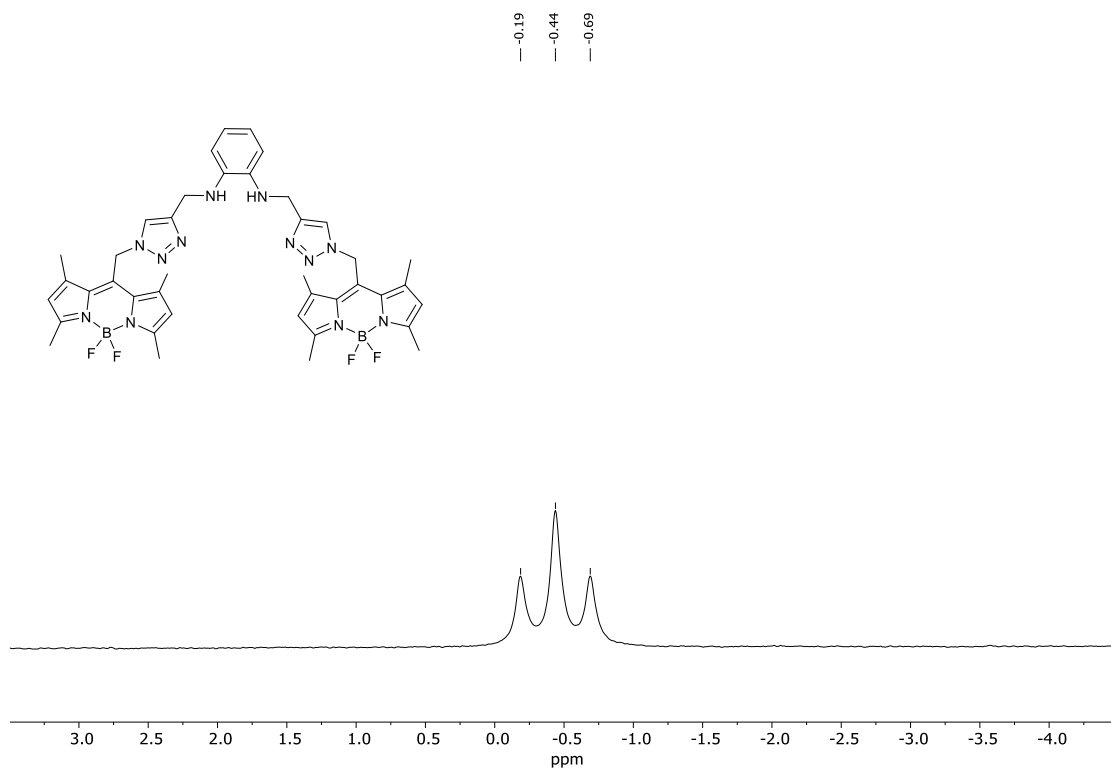

**Figure S4.**  $^{11}\text{B}$  NMR spectrum (128 MHz) of **BODIPY-NN** in  $\text{CDCl}_3$ .

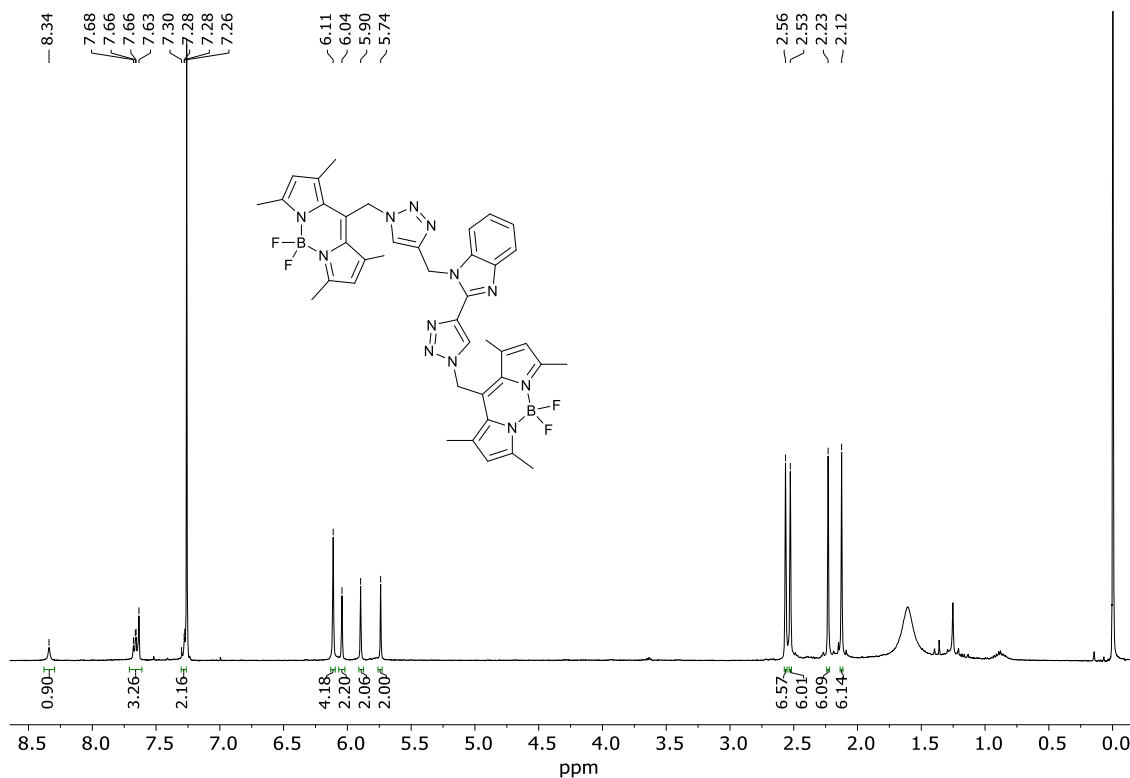

Figure S5.  $^1\text{H}$  NMR spectrum (400 MHz) of BTB in  $\text{CDCl}_3$ .

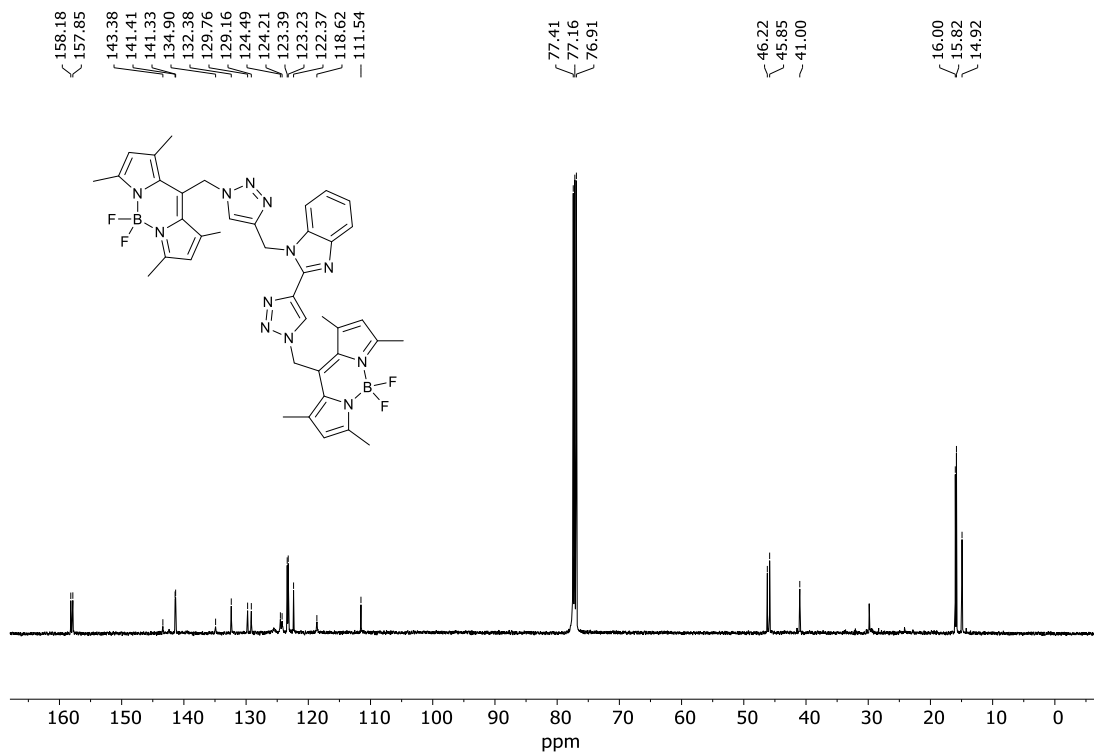

Figure S6.  $^{13}\text{C}$  NMR spectrum (100 MHz) of BTB in  $\text{CDCl}_3$ .

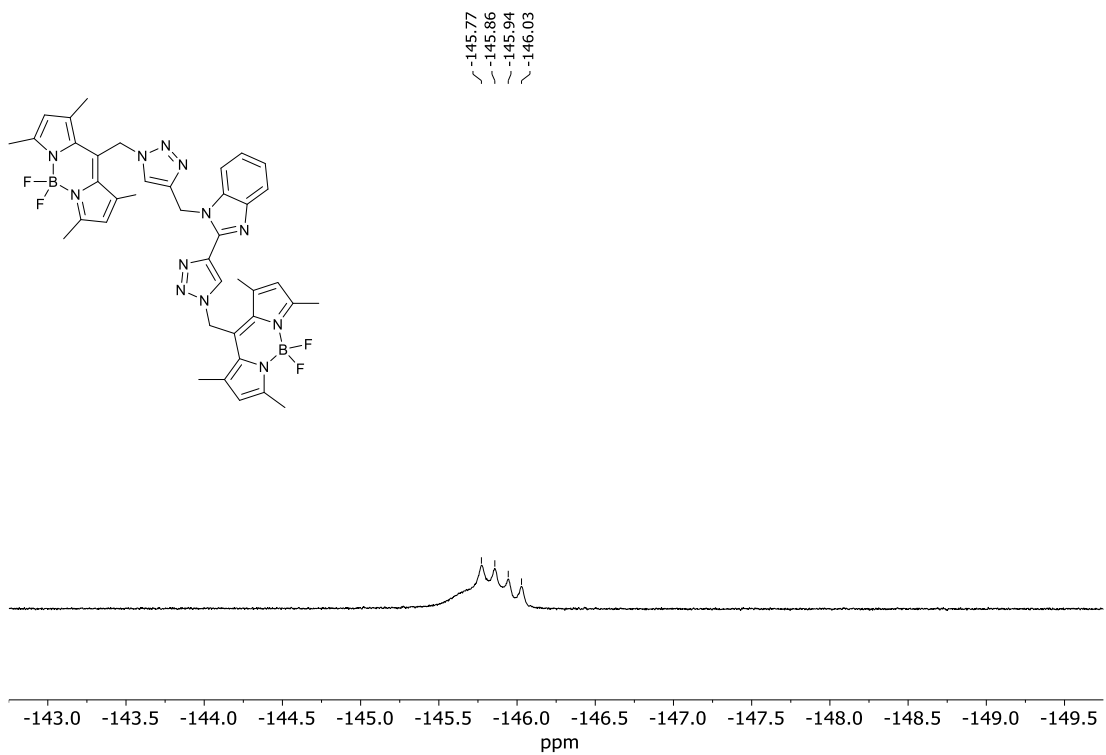

**Figure S7.**  $^{19}\text{F}$  NMR spectrum (376 MHz) of **BTB** in  $\text{CDCl}_3$ .

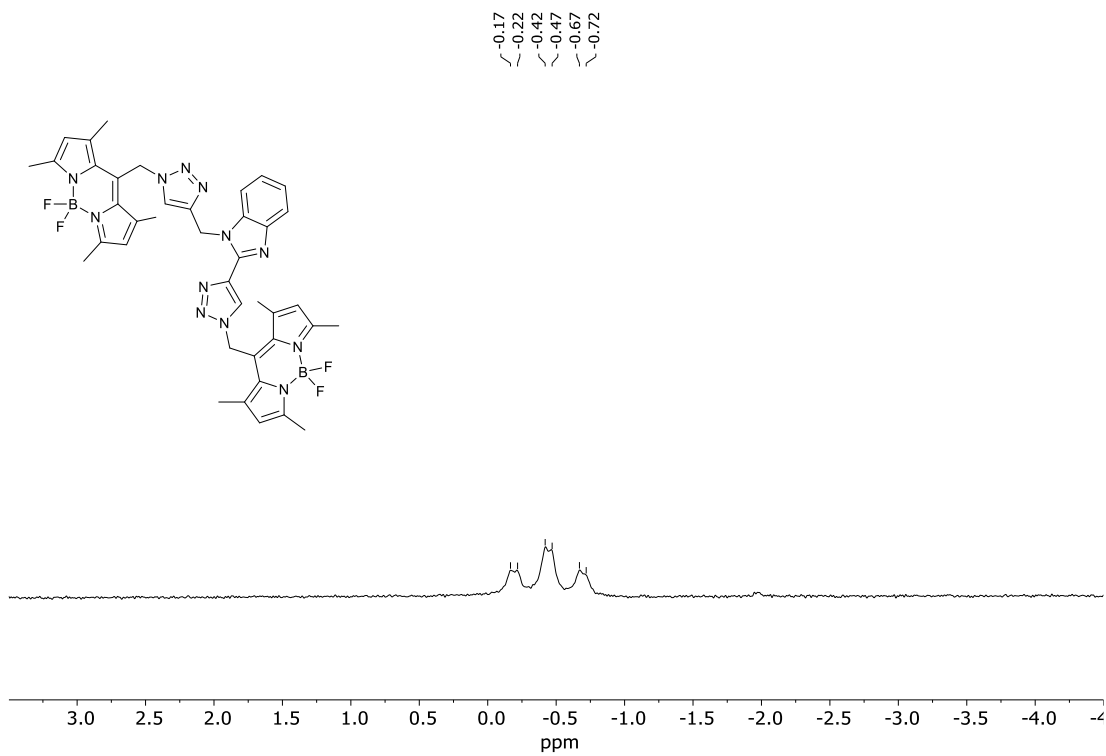

**Figure S8.**  $^{11}\text{B}$  NMR spectrum (128 MHz) of **BTB** in  $\text{CDCl}_3$ .

1c. Mass spectra

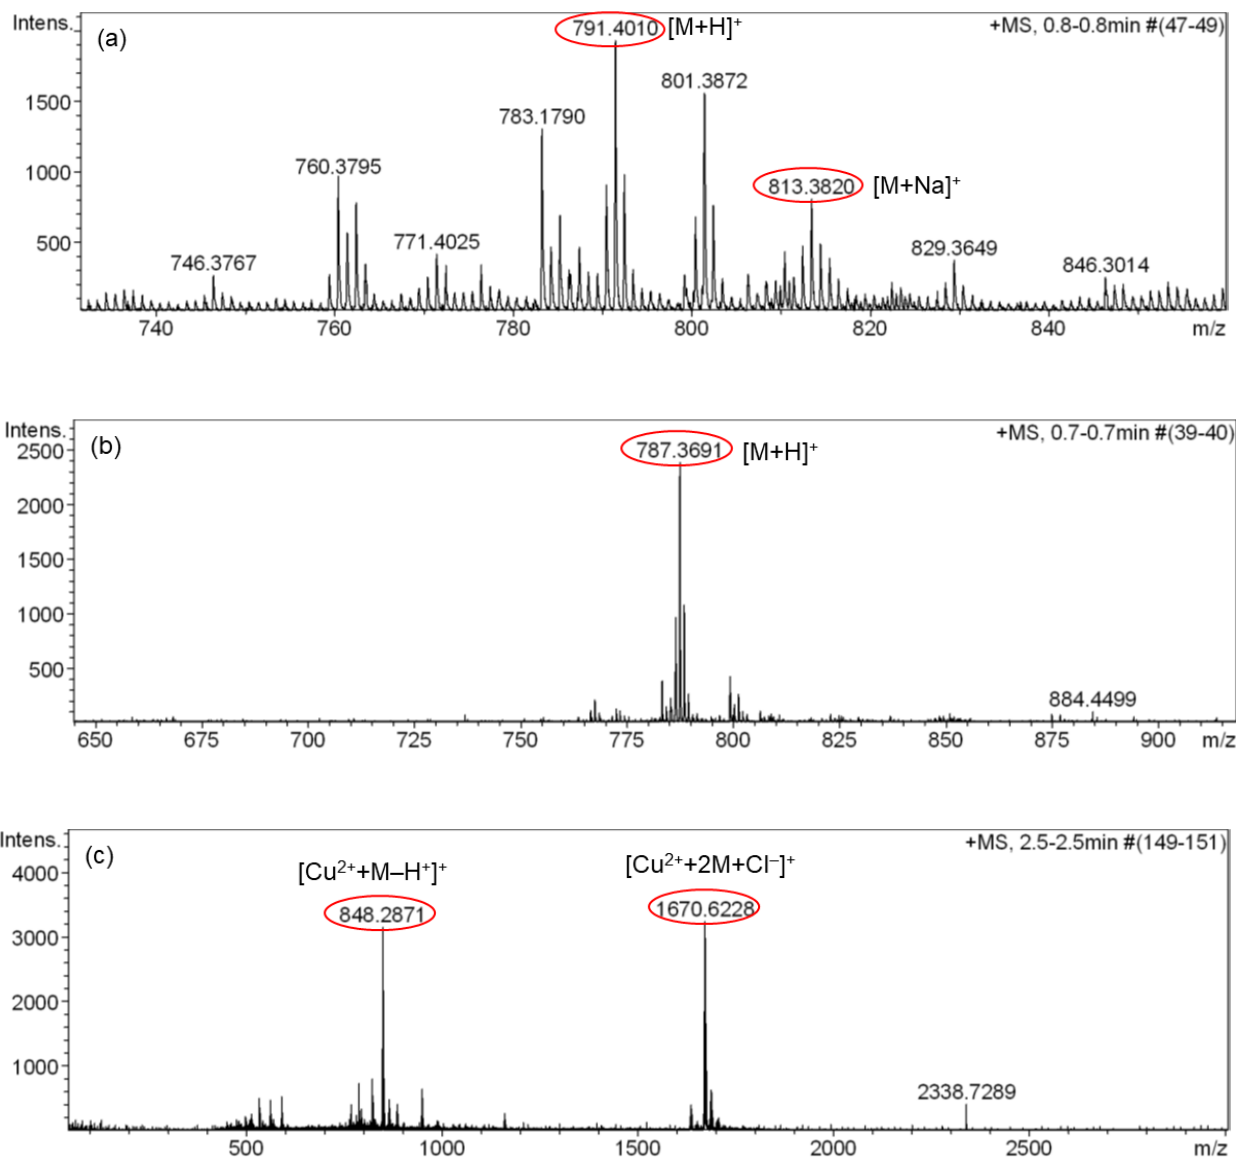

Figure S9. ESI-MS spectra of (a) BODIPY-NN, (b) BTB, and (c) BODIPY-NN + CuCl<sub>2</sub> (1 equiv.).

## 1d. ESR spectra

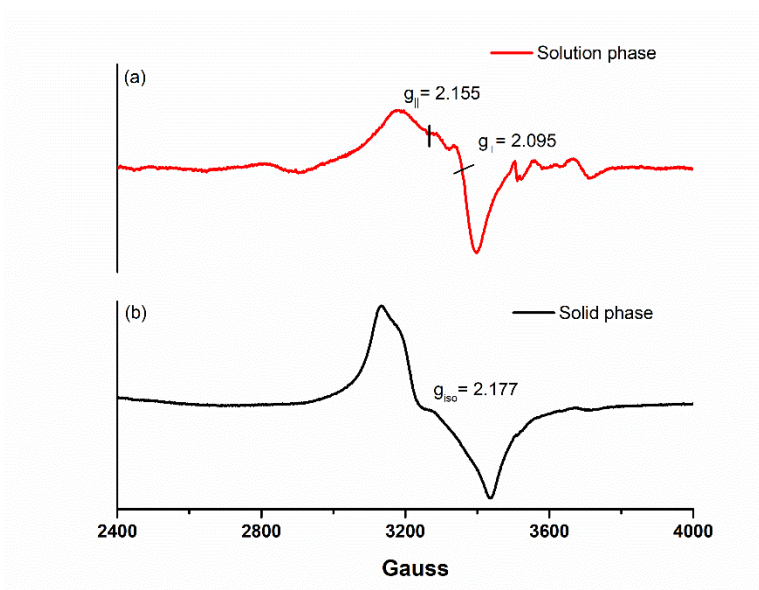

**Figure S10.** ESR spectra of Cu-BTB complex (a) in CH<sub>3</sub>CN solution and (b) in solid form.

## 2. Photophysical and sensing studies

### 2a. Absorption studies of BODIPY-NN in the presence of different metal ions

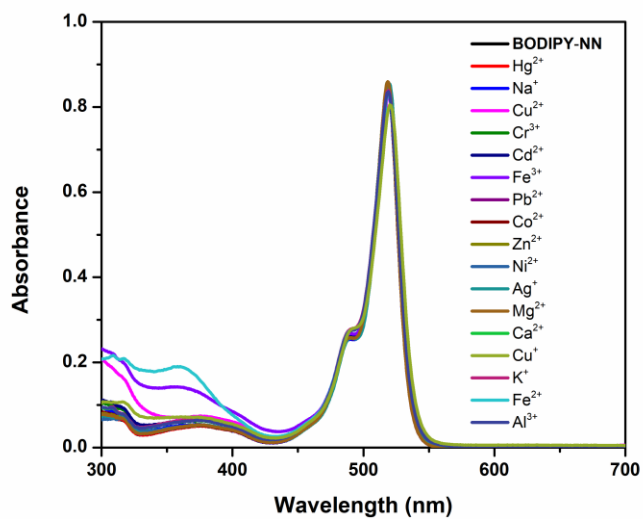

**Figure S11.** Absorption spectra of BODIPY-NN (5 μM) upon addition of different metal ions (10 equiv.) in THF/water (9:1).



## 2b. Determination of fluorescence quantum yield

Emission quantum yield was calculated by the following equation:  $\Phi_x = \Phi_{ST} \left( \frac{Grad_x}{Grad_{ST}} \right) \left( \frac{\eta_x^2}{\eta_{ST}^2} \right)$

where the subscripts ST and X denote standard and test respectively,  $\Phi$  is the fluorescence quantum yield, Grad stands for the gradient from the plot of integrated fluorescence intensity vs absorbance, and  $\eta$  is the refractive index of the solvent. Fluorescein in 0.1 M NaOH ( $\Phi = 0.95$ ) was used as the standard.

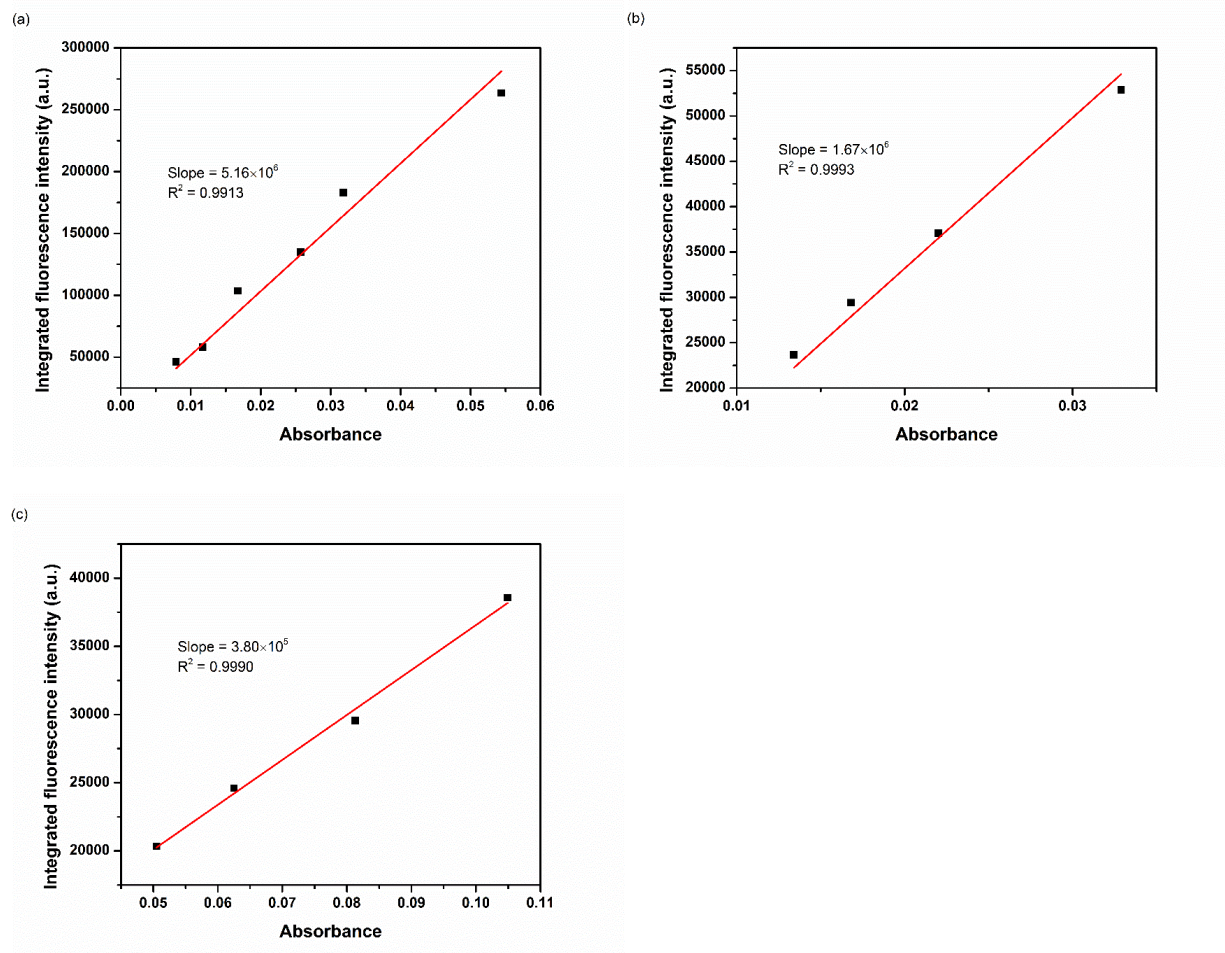

**Figure S12.** Plots of integrated fluorescence intensity of (a) fluorescein, (b) **BODIPY-NN** in the presence of 15 equiv. of  $Cu^{2+}$ , and (c) **BODIPY-NN** against absorbance.

### 2c. Calculation of limit of detection

The limit of detection (LOD) of the fluorescent probe **BODIPY-NN** for  $\text{Cu}^{2+}$  was determined from the following equation:  $\text{LOD} = 3\sigma/K$  where  $\sigma$  is the standard deviation of the blank solution and  $K$  is the slope of the calibration curve.

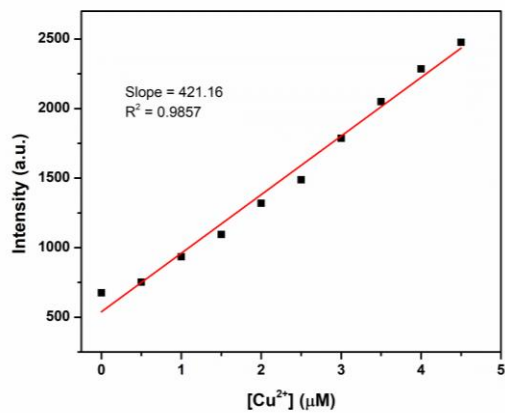

**Figure S13.** Linear relationship between fluorescence intensities of **BODIPY-NN** and concentrations of  $\text{Cu}^{2+}$ .

### 2d. Time-dependent fluorescence change studies

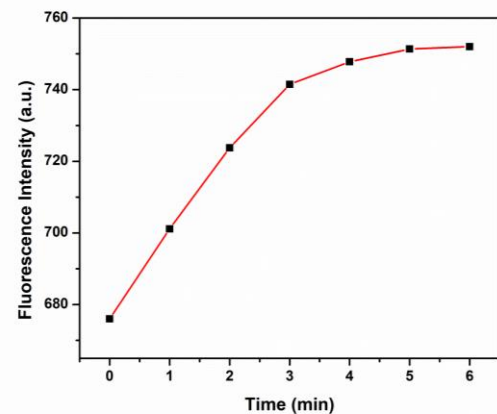

**Figure S14.** Fluorescence intensity changes of **BODIPY-NN** (0.5  $\mu\text{M}$ ) versus time in the presence of 1 equiv. of  $\text{Cu}^{2+}$ .

## 2e. DFT calculation

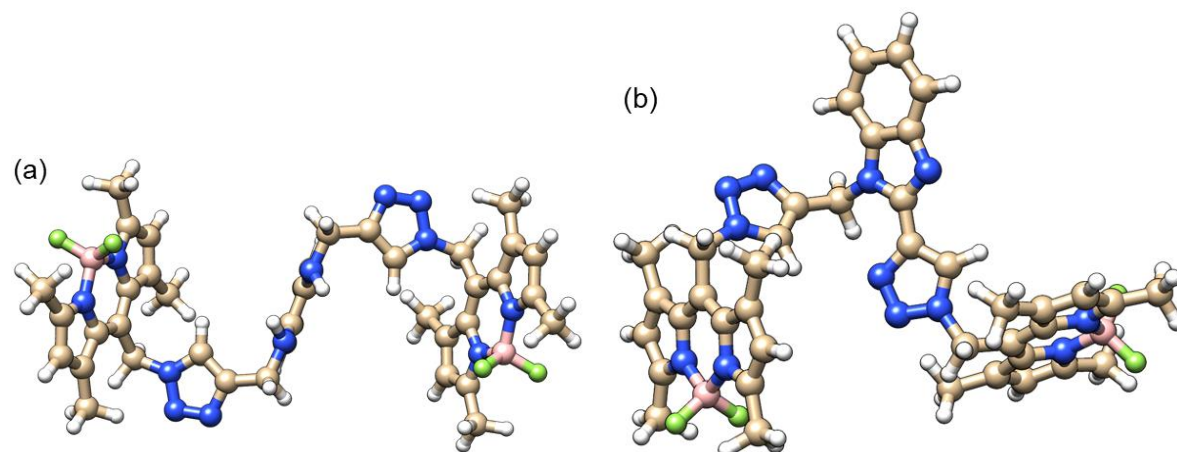

**Figure S15.** Optimized structures of (a) **BODIPY-NN** and (b) **BTB** by B3LYP/6-31G(d).

**Table S1.** Calculated excitation energies (in eV and nm), oscillator strengths ( $f$ ), and molecular orbital (MO) compositions for the low-lying excited states of **BODIPY-NN** and **BTB** using CAM-B3LYP/6-31G(d).

| Compound         | State | MO composition                                                     | Excitation energy (eV) | $\lambda_{\text{abs}}$ (nm) | $f$    |
|------------------|-------|--------------------------------------------------------------------|------------------------|-----------------------------|--------|
| <b>BODIPY-NN</b> | S1    | H-2→LUMO (16%)<br>H-2→L+1 (33%)<br>H-1→LUMO (33%)<br>H-1→L+1 (16%) | 2.797                  | 443.33                      | 0.7041 |
|                  | S2    | H-2→LUMO (43%)<br>H-2→L+1 (44%)<br>H-1→LUMO (6%)<br>H-1→L+1 (6%)   | 2.800                  | 442.74                      | 0.5210 |
| <b>BTB</b>       | S1    | H-1→LUMO (63%)<br>HOMO→L+1 (35%)                                   | 2.783                  | 445.46                      | 0.1152 |
|                  | S2    | H-1→LUMO (35%)<br>HOMO→L+1 (63%)                                   | 2.800                  | 442.80                      | 1.1075 |

**Table S2.** Frontier molecular orbitals (MOs), MO energies of **BODIPY-NN** and **BTB**.

|             | <b>BODIPY-NN</b>                                                                    | <b>BTB</b>                                                                           |
|-------------|-------------------------------------------------------------------------------------|--------------------------------------------------------------------------------------|
| <b>L+2</b>  | 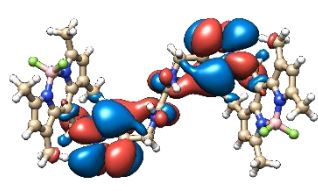   |    |
|             | 0.997 eV                                                                            | 0.111 eV                                                                             |
| <b>L+1</b>  |    |    |
|             | -1.780 eV                                                                           | -1.791 eV                                                                            |
| <b>LUMO</b> |   |   |
|             | -1.780 eV                                                                           | -1.817 eV                                                                            |
| <b>HOMO</b> |  |  |
|             | -6.579 eV                                                                           | -6.849 eV                                                                            |
| <b>H-1</b>  |  |  |
|             | -6.846 eV                                                                           | -6.866 eV                                                                            |
| <b>H-2</b>  |  |  |
|             | -6.846 eV                                                                           | -7.354 eV                                                                            |

## Cartesian coordinates of optimized geometries

### BODIPY-NN

|   |               |               |               |
|---|---------------|---------------|---------------|
| F | 8.4196790000  | -2.3492310000 | 1.1989490000  |
| F | 6.4234400000  | -2.1687880000 | 2.3069480000  |
| F | -6.4258610000 | 2.1689710000  | 2.3070050000  |
| F | -8.4214370000 | 2.3484710000  | 1.1976580000  |
| N | 7.5086540000  | -0.1394740000 | 1.5630360000  |
| N | 6.4633040000  | -1.7043310000 | -0.0661720000 |
| N | 4.5804390000  | 2.3774490000  | -0.7493570000 |
| N | 4.3614990000  | 3.7130900000  | -0.7151030000 |
| N | 3.1203480000  | 3.8962370000  | -0.3538380000 |
| N | -3.1193020000 | -3.8955380000 | -0.3544280000 |
| N | -4.3603280000 | -3.7124730000 | -0.7161900000 |
| N | -4.5797090000 | -2.3768800000 | -0.7492680000 |
| N | -6.4638380000 | 1.7045240000  | -0.0661290000 |
| N | -7.5096500000 | 0.1391470000  | 1.5622850000  |
| C | 6.0616080000  | -0.6068920000 | -0.8361790000 |
| C | 6.3700030000  | 0.6993290000  | -0.4100100000 |
| C | 7.0958470000  | 0.9367950000  | 0.7676020000  |
| C | 7.5621960000  | 2.1464440000  | 1.3977130000  |
| C | 8.2294730000  | 1.7439140000  | 2.5459750000  |
| H | 8.7111680000  | 2.3933890000  | 3.2656600000  |
| C | 8.1826240000  | 0.3364350000  | 2.6261130000  |
| C | 8.7618320000  | -0.5490780000 | 3.6798200000  |
| H | 7.9848530000  | -1.1866400000 | 4.1145640000  |
| H | 9.2233460000  | 0.0478840000  | 4.4702600000  |
| H | 9.5131950000  | -1.2191780000 | 3.2485530000  |
| C | 7.4323980000  | 3.5801020000  | 0.9700180000  |
| H | 8.0099100000  | 3.7898560000  | 0.0592530000  |
| H | 7.8296540000  | 4.2314410000  | 1.7543530000  |
| H | 6.3988820000  | 3.8828310000  | 0.7748250000  |
| C | 6.0584760000  | -2.8373560000 | -0.6706650000 |
| C | 5.3810820000  | -2.5024230000 | -1.8601240000 |
| H | 4.9469910000  | -3.2128500000 | -2.5519400000 |

|   |               |               |               |
|---|---------------|---------------|---------------|
| C | 5.3680320000  | -1.1194600000 | -1.9907710000 |
| C | 6.3200880000  | -4.1946730000 | -0.1055500000 |
| H | 7.3957570000  | -4.3607220000 | 0.0131710000  |
| H | 5.9045930000  | -4.9671650000 | -0.7573190000 |
| H | 5.8762160000  | -4.2875560000 | 0.8915230000  |
| C | 4.7398530000  | -0.4094790000 | -3.1586680000 |
| H | 3.9767550000  | 0.3194330000  | -2.8632640000 |
| H | 4.2465180000  | -1.1416200000 | -3.8046430000 |
| H | 5.4811370000  | 0.1143420000  | -3.7760400000 |
| C | 5.8714030000  | 1.8737070000  | -1.2271620000 |
| H | 6.5527770000  | 2.7196370000  | -1.1755200000 |
| H | 5.7761130000  | 1.5998070000  | -2.2768290000 |
| C | 3.4537710000  | 1.6987280000  | -0.4092860000 |
| H | 3.4099950000  | 0.6218810000  | -0.3789810000 |
| C | 2.5233180000  | 2.6846350000  | -0.1562950000 |
| C | 1.0824260000  | 2.5750120000  | 0.2813580000  |
| H | 0.9948170000  | 2.8767960000  | 1.3321640000  |
| H | 0.4819450000  | 3.2936330000  | -0.2870190000 |
| N | 0.4811900000  | 1.2554500000  | 0.1621710000  |
| H | 0.8619490000  | 0.5865710000  | 0.8263920000  |
| C | 0.2603830000  | 0.6620860000  | -1.0972690000 |
| C | 0.4783400000  | 1.3094810000  | -2.3166510000 |
| H | 0.8660800000  | 2.3225300000  | -2.3275890000 |
| C | 0.2288020000  | 0.6556000000  | -3.5286330000 |
| H | 0.4095130000  | 1.1776240000  | -4.4641970000 |
| C | -0.2273780000 | -0.6581370000 | -3.5281460000 |
| H | -0.4079600000 | -1.1808910000 | -4.4633280000 |
| C | -0.4770810000 | -1.3110960000 | -2.3157070000 |
| H | -0.8647590000 | -2.3241770000 | -2.3259200000 |
| C | -0.2593500000 | -0.6627340000 | -1.0967890000 |
| N | -0.4803800000 | -1.2551130000 | 0.1630230000  |
| H | -0.8605600000 | -0.5855530000 | 0.8268800000  |
| C | -1.0822240000 | -2.5743060000 | 0.2832540000  |
| H | -0.9954240000 | -2.8748450000 | 1.3344850000  |

|   |               |               |               |
|---|---------------|---------------|---------------|
| H | -0.4816990000 | -3.2938840000 | -0.2838620000 |
| C | -2.5228180000 | -2.6839320000 | -0.1553350000 |
| C | -3.4534710000 | -1.6980960000 | -0.4078980000 |
| H | -3.4101260000 | -0.6212620000 | -0.3764850000 |
| C | -5.8705430000 | -1.8731750000 | -1.2274570000 |
| H | -6.5518400000 | -2.7192100000 | -1.1763450000 |
| H | -5.7748560000 | -1.5989480000 | -2.2770040000 |
| C | -6.3696810000 | -0.6990690000 | -0.4102380000 |
| C | -6.0613620000 | 0.6072890000  | -0.8360320000 |
| C | -7.0960260000 | -0.9369040000 | 0.7669880000  |
| C | -7.5622720000 | -2.1467730000 | 1.3967240000  |
| C | -8.2303350000 | -1.7445910000 | 2.5446580000  |
| H | -8.7121620000 | -2.3943160000 | 3.2640290000  |
| C | -8.1840830000 | -0.3371040000 | 2.6249300000  |
| C | -8.7642180000 | 0.5481370000  | 3.6783640000  |
| H | -7.9877210000 | 1.1860270000  | 4.1134790000  |
| H | -9.2258620000 | -0.0490370000 | 4.4685650000  |
| H | -9.5156540000 | 1.2179120000  | 3.2467300000  |
| C | -7.4315910000 | -3.5803460000 | 0.9690200000  |
| H | -8.0089960000 | -3.7904370000 | 0.0582560000  |
| H | -7.8284270000 | -4.2319450000 | 1.7533540000  |
| H | -6.3979140000 | -3.8824520000 | 0.7737930000  |
| C | -5.3670940000 | 1.1201950000  | -1.9900620000 |
| C | -5.3805280000 | 2.5031330000  | -1.8591950000 |
| H | -4.9461430000 | 3.2137770000  | -2.5506050000 |
| C | -6.0588450000 | 2.8377300000  | -0.6701670000 |
| C | -4.7379330000 | 0.4105680000  | -3.1576380000 |
| H | -3.9750540000 | -0.3184250000 | -2.8618710000 |
| H | -4.2440900000 | 1.1429020000  | -3.8030110000 |
| H | -5.4787030000 | -0.1130910000 | -3.7757700000 |
| C | -6.3210040000 | 4.1948910000  | -0.1049270000 |
| H | -7.3966660000 | 4.3599670000  | 0.0150840000  |
| H | -5.9069360000 | 4.9676730000  | -0.7572610000 |
| H | -5.8759970000 | 4.2883010000  | 0.8916100000  |

|   |               |               |              |
|---|---------------|---------------|--------------|
| B | 7.2222940000  | -1.6455340000 | 1.2930930000 |
| B | -7.2237550000 | 1.6453440000  | 1.2926010000 |

**BTB**

|   |               |               |               |
|---|---------------|---------------|---------------|
| F | 8.0796900000  | -2.2129550000 | -0.4974130000 |
| F | 7.5460530000  | -0.1334030000 | -1.2938690000 |
| F | -4.2274740000 | -3.8871150000 | -0.3399760000 |
| F | -6.1152440000 | -4.0551840000 | 0.9443160000  |
| N | 5.8767120000  | -1.8795360000 | -1.4329460000 |
| N | 6.5037610000  | -0.8782950000 | 0.7586890000  |
| N | 1.9788280000  | -0.5255660000 | 0.3819390000  |
| N | 0.7145810000  | -0.7261550000 | -0.0618530000 |
| N | 0.1882900000  | 0.4470460000  | -0.2830030000 |
| N | -3.4852150000 | 3.5357100000  | -1.3661880000 |
| N | -4.5708050000 | 3.1430020000  | -0.7602790000 |
| N | -4.2815340000 | 1.9764740000  | -0.1293310000 |
| N | -4.5314860000 | -2.3032790000 | 1.4625540000  |
| N | -5.9378510000 | -2.1930140000 | -0.5878660000 |
| C | 5.1795830000  | -1.0272450000 | 1.1850430000  |
| C | 4.2219360000  | -1.5859660000 | 0.3170920000  |
| C | 4.5620970000  | -2.0229290000 | -0.9721090000 |
| C | 3.7989250000  | -2.6481740000 | -2.0240630000 |
| C | 4.6865160000  | -2.8447130000 | -3.0717570000 |
| H | 4.4553080000  | -3.2935730000 | -4.0292390000 |
| C | 5.9559650000  | -2.3649520000 | -2.6851250000 |
| C | 7.2230930000  | -2.3620780000 | -3.4745890000 |
| H | 7.6164370000  | -1.3439440000 | -3.5620510000 |
| H | 7.0538000000  | -2.7718050000 | -4.4732980000 |
| H | 7.9925140000  | -2.9534840000 | -2.9668340000 |
| C | 2.3579570000  | -3.0696050000 | -2.0651970000 |
| H | 2.1510520000  | -3.8925350000 | -1.3674180000 |
| H | 2.1140340000  | -3.4354940000 | -3.0670070000 |
| H | 1.6607510000  | -2.2603480000 | -1.8269460000 |
| C | 7.2262050000  | -0.3258870000 | 1.7513780000  |



|   |               |               |               |
|---|---------------|---------------|---------------|
| C | 6.3830370000  | -0.1024520000 | 2.8586720000  |
| H | 6.6926210000  | 0.3311880000  | 3.8009360000  |
| C | 5.1022090000  | -0.5312400000 | 2.5356350000  |
| C | 8.6832140000  | -0.0262440000 | 1.6220520000  |
| H | 9.2473420000  | -0.9426950000 | 1.4189240000  |
| H | 9.0620680000  | 0.4351130000  | 2.5373200000  |
| H | 8.8620460000  | 0.6468220000  | 0.7769870000  |
| C | 3.9452540000  | -0.4632070000 | 3.4942940000  |
| H | 3.0843970000  | 0.0850590000  | 3.0952650000  |
| H | 4.2597090000  | 0.0534580000  | 4.4059520000  |
| H | 3.5947840000  | -1.4587350000 | 3.7967210000  |
| C | 2.7834850000  | -1.6874200000 | 0.7809090000  |
| H | 2.2800150000  | -2.5496210000 | 0.3504580000  |
| H | 2.7322880000  | -1.7894940000 | 1.8636780000  |
| C | 2.2636030000  | 0.7956960000  | 0.4491530000  |
| H | 3.2161630000  | 1.1913380000  | 0.7613710000  |
| C | 1.1052500000  | 1.4177860000  | 0.0158360000  |
| C | 0.8698240000  | 2.8523820000  | -0.0678430000 |
| N | 1.6324680000  | 3.7220560000  | 0.5668400000  |
| C | 1.0946010000  | 4.9581730000  | 0.2632780000  |
| C | 1.5016080000  | 6.2394710000  | 0.6614870000  |
| H | 2.3679310000  | 6.3632430000  | 1.3042020000  |
| C | 0.7648030000  | 7.3271160000  | 0.2077090000  |
| H | 1.0572820000  | 8.3318510000  | 0.5004440000  |
| C | -0.3638340000 | 7.1561890000  | -0.6218470000 |
| H | -0.9214240000 | 8.0308180000  | -0.9452760000 |
| C | -0.7885490000 | 5.8942770000  | -1.0283230000 |
| H | -1.6766600000 | 5.7613750000  | -1.6380970000 |
| C | -0.0348560000 | 4.8073280000  | -0.5762720000 |
| N | -0.1560430000 | 3.4419080000  | -0.7889400000 |
| C | -1.1140130000 | 2.8177360000  | -1.7080970000 |
| H | -0.7027880000 | 1.8565270000  | -2.0141390000 |
| H | -1.1893540000 | 3.4618030000  | -2.5894160000 |
| C | -2.4862760000 | 2.6361390000  | -1.1316920000 |

|   |               |               |               |
|---|---------------|---------------|---------------|
| C | -2.9874760000 | 1.6265960000  | -0.3348600000 |
| H | -2.5345140000 | 0.7283240000  | 0.0541860000  |
| C | -5.3179580000 | 1.3424280000  | 0.6920690000  |
| H | -6.2612320000 | 1.7561220000  | 0.3421670000  |
| H | -5.1918650000 | 1.6617740000  | 1.7254010000  |
| C | -5.3010130000 | -0.1690870000 | 0.5924430000  |
| C | -4.5807770000 | -0.9078680000 | 1.5502280000  |
| C | -5.9837950000 | -0.7990280000 | -0.4597250000 |
| C | -6.7942770000 | -0.2901990000 | -1.5376270000 |
| C | -7.1925910000 | -1.3995640000 | -2.2699920000 |
| H | -7.8145280000 | -1.3904530000 | -3.1559320000 |
| C | -6.6555320000 | -2.5559410000 | -1.6668310000 |
| C | -6.8154170000 | -3.9787920000 | -2.0907220000 |
| H | -5.8375630000 | -4.4396580000 | -2.2649180000 |
| H | -7.4126240000 | -4.0418650000 | -3.0037020000 |
| H | -7.3012050000 | -4.5617220000 | -1.3008170000 |
| C | -7.2048980000 | 1.1160740000  | -1.8676010000 |
| H | -7.8879340000 | 1.5306710000  | -1.1135800000 |
| H | -7.7421520000 | 1.1245130000  | -2.8207460000 |
| H | -6.3613040000 | 1.8077720000  | -1.9534780000 |
| C | -3.8152120000 | -0.5199380000 | 2.7069880000  |
| C | -3.3394380000 | -1.7005200000 | 3.2630580000  |
| H | -2.7223570000 | -1.7860120000 | 4.1483980000  |
| C | -3.7928730000 | -2.7817040000 | 2.4811930000  |
| C | -3.5309230000 | 0.8384610000  | 3.2855830000  |
| H | -3.0888630000 | 1.5299480000  | 2.5597720000  |
| H | -2.8211420000 | 0.7402870000  | 4.1124560000  |
| H | -4.4311480000 | 1.3162320000  | 3.6936190000  |
| C | -3.5388500000 | -4.2397690000 | 2.6800860000  |
| H | -4.4837480000 | -4.7821540000 | 2.7897590000  |
| H | -2.9231620000 | -4.4040170000 | 3.5679950000  |
| H | -3.0334950000 | -4.6632140000 | 1.8056550000  |
| B | 7.0695140000  | -1.2661680000 | -0.6410610000 |
| B | -5.2003680000 | -3.1810210000 | 0.3624430000  |

## 2f. Application in real water samples

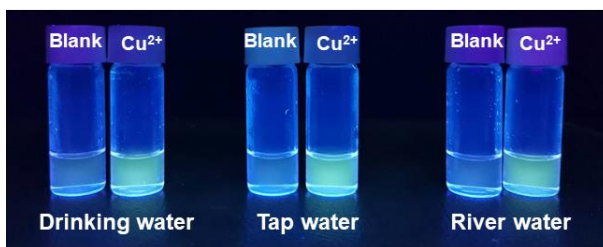

**Figure S16.** Visual tests were performed on **BODIPY-NN**. Blank solution contains 0.5 mL of **BODIPY-NN** (5  $\mu\text{M}$ ) in THF and 0.5 mL of real water samples. Test solution contains 0.5 mL of **BODIPY-NN** (5  $\mu\text{M}$ ) in THF and 0.5 mL of copper(II)chloride in real water samples (31.5  $\mu\text{M}$ ).

## 2g. Cell imaging studies

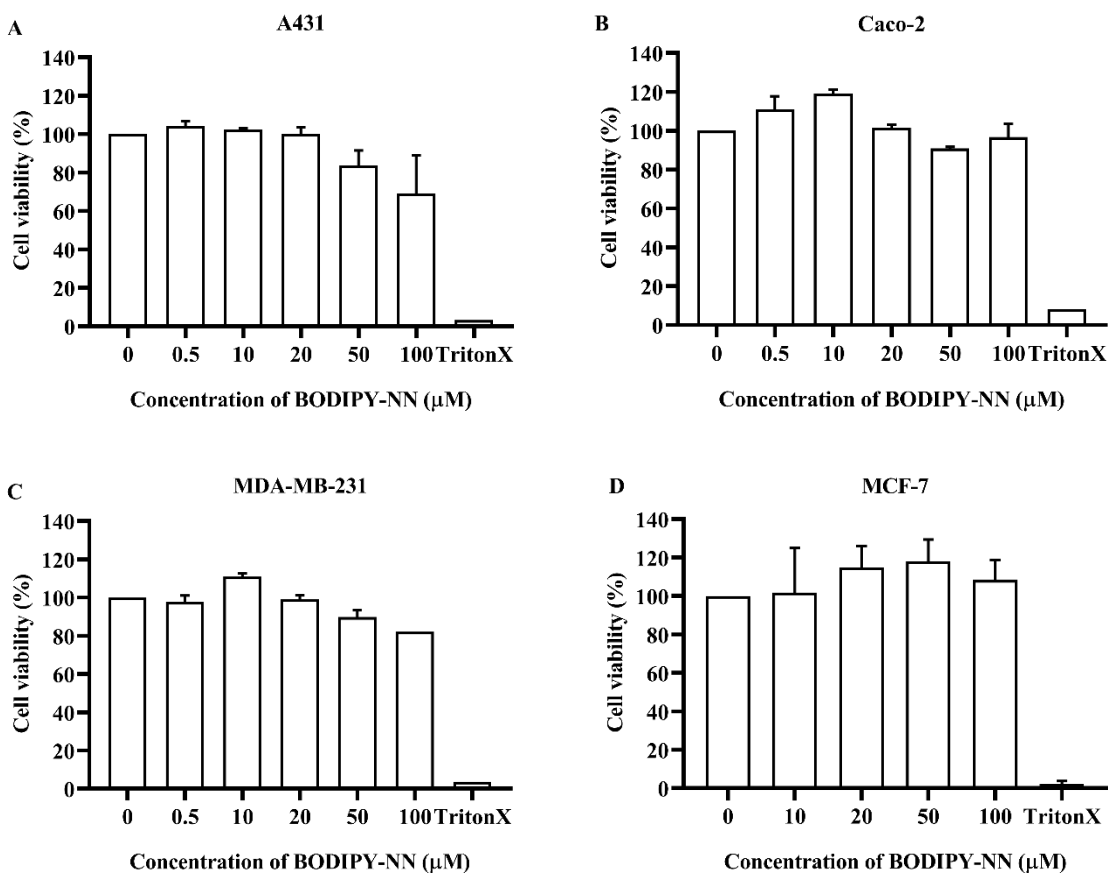

**Figure S17.** Viability of cells after incubation with different concentrations of **BODIPY-NN** for 24 h. (A) human epidermoid squamous carcinoma cell line (A431 cells), (B) human colorectal adenocarcinoma cell line (Caco-2 cells), (C) human triple-negative breast cancer cell line (MDA-MB-231 cells) and (D) human breast cancer cell line (MCF-7 cells). Data are represented as mean  $\pm$  standard deviation (SD). N = 2.

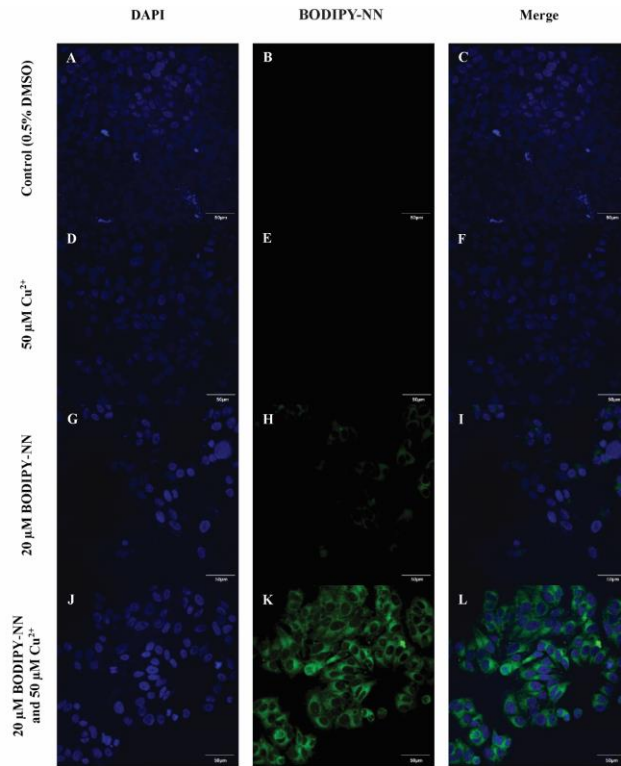

**Figure S18.** Confocal Laser Scanning Microscope (FV10i-DOC) images of MCF-7 cells: (A-C) images of cells after 2 h incubation with 0.5% DMSO; (D-F) images of cells after 2 h incubation with **50  $\mu\text{M}$   $\text{Cu}^{2+}$** ; (G-I) images of cells after 2 h incubation with **20  $\mu\text{M}$  BODIPY-NN**; and (J-L) images of cells after 2 h incubation with **20  $\mu\text{M}$  BODIPY-NN** followed by the addition of **50  $\mu\text{M}$   $\text{Cu}^{2+}$** . (A, D, G, J) are blue fluorescence of MCF-7 cells nuclei stained with DAPI. (B, E, H, K) are green fluorescence of **BODIPY-NN**. (C, F, I, L) are combined images of DAPI and **BODIPY-NN**. Scale bars represent 50  $\mu\text{m}$ .

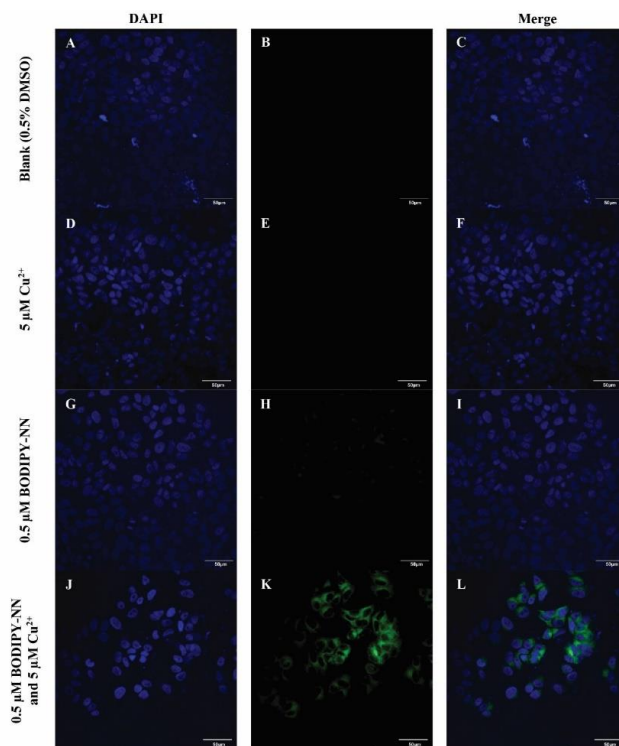

**Figure S19.** Confocal Laser Scanning Microscope images of MCF-7 cells: (A-C) images of cells after 2 h incubation with 0.5% DMSO; (D-F) images of cells after 2 h incubation with **5  $\mu\text{M}$   $\text{Cu}^{2+}$** ; (G-I) images of cells after 2 h incubation with **0.5  $\mu\text{M}$  BODIPY-NN**; and (J-L) images of cells after 2 h incubation with **0.5  $\mu\text{M}$  BODIPY-NN** followed by the addition of **5  $\mu\text{M}$   $\text{Cu}^{2+}$**  for 30 min. Notes: **BODIPY-NN** is green, while nuclei of the cells were blue stained using DAPI. (A, D, G, J) are blue fluorescence of MCF-7 nuclei. (B, E, H, K) are green fluorescence of **BODIPY-NN**. (C, F, I, L) are combined images of blue and green fluorescence. Scale bars represent 50  $\mu\text{m}$ .

### 3. Comparison of BODIPY-NN to other recently reported fluorescent Cu(II) probes

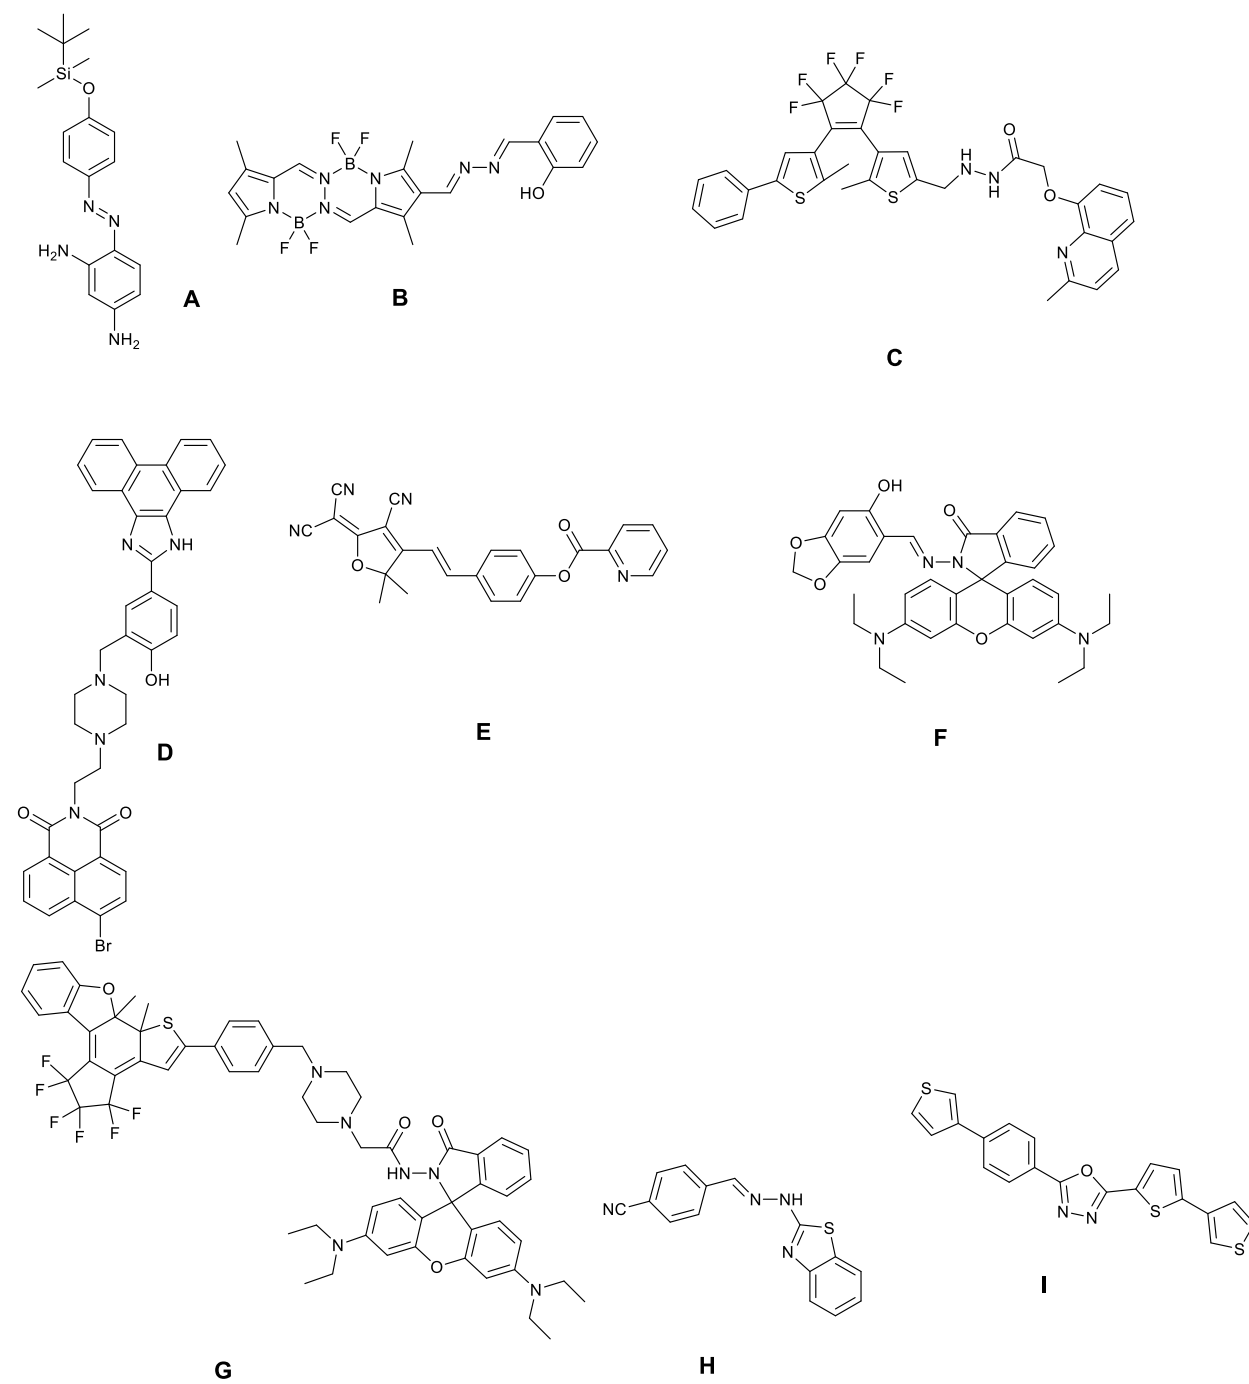

**Table S3.** Comparison of **BODIPY-NN** to other recently reported fluorescent probes for Cu(II) detection.

| Probe            | $\lambda_{Ex}/\lambda_{Em}$ (nm) | Media                             | Roles of Cu <sup>2+</sup>                 | LOD ( $\mu$ M) | Ref.      |
|------------------|----------------------------------|-----------------------------------|-------------------------------------------|----------------|-----------|
| A                | 350/484                          | DMSO/HEPES, (0.2/9.8, v/v)        | catalyst for cyclization                  | 100            | 1         |
| B                | 452/482                          | MeCN/phosphate buffer, (5/5, v/v) | catalyst for hydrolysis                   | 0.050          | 2         |
| C                | 350/510                          | MeCN                              | chelating agent                           | 0.370          | 3         |
| D                | 405/455                          | MeCN/HEPES, (0.6/9.4, v/v)        | chelating agent                           | 0.650          | 4         |
| E                | 580/610                          | DMSO/H <sub>2</sub> O, (1/9, v/v) | catalyst for C-O cleavage                 | 0.054          | 5         |
| F                | 515/585                          | MeCN/HEPES, (2/3, v/v)            | chelating agent /ring-opening catalyst    | 0.110          | 6         |
| G                | 520/617                          | MeCN/H <sub>2</sub> O, (4/1, v/v) | chelating agent                           | 0.280          | 7         |
| H                | 375/ 455                         | MeCN/H <sub>2</sub> O, (3/1 v/v)  | chelating agent                           | 0.640          | 8         |
| I                | 325/403                          | MeCN/H <sub>2</sub> O, (1/1 v/v)  | chelating agent                           | 0.593          | 9         |
| <b>BODIPY-NN</b> | 470/529                          | THF/H <sub>2</sub> O, (9/1, v/v)  | catalyst for cyclization/ chelating agent | 0.085          | This work |

#### 4. References

- 1 M. Gupta, A. Balamurugan and H. Il Lee, *Sens. Actuators, B*, 2015, **211**, 531–536.
- 2 Y. Li, H. Zhou, S. Yin, H. Jiang, N. Niu, H. Huang, S. A. Shahzad and C. Yu, *Sens. Actuators, B*, 2016, **235**, 33–38.
- 3 Z. Shi, Y. Tu, R. Wang, G. Liu and S. Pu, *Dyes Pigm.*, 2018, **149**, 764–773.
- 4 S. Anbu, A. Paul, K. Surendranath, A. Sidali and A. J. L. Pombeiro, *J. Inorg. Biochem.*, 2021, **220**, 111466.
- 5 K. H. Nguyen, Y. Hao, K. Zeng, X. Wei, S. Yuan, F. Li, S. Fan, M. Xu and Y. N. Liu, *J. Photochem. Photobiol., A*, 2018, **358**, 201–206.
- 6 B. Zhang, Q. Diao, P. Ma, X. Liu, D. Song and X. Wang, *Sens. Actuators, B*, 2016, **225**, 579–585.
- 7 H. Ding, B. Li, S. Pu, G. Liu, D. Jia and Y. Zhou, *Sens. Actuators, B*, 2017, **247**, 26–35.
- 8 J. Nootem, R. Daengngern, C. Sattayanon, W. Wattanathana, S. Wannapaiboon, P. Rashatasakhon and K. Chansaenpak, *J. Photochem. Photobiol., A*, 2021, **415**, 1010–6030.
- 9 L. Naik, C. V. Maridevarmath, M. S. Thippeswamy, H. M. Savanur, I. A. M. Khazi and G. H. Malimath, *Mater. Chem. Phys.*, 2021, **260**, 124063.
